# Supplementary material for: A fluffy all-siloxane bottlebrush architecture for liquid-like slippery surfaces
Source: Royal Society of Chemistry journal article supplement (doi:10.1039/d3ta03536k), 2023-01-01
Supplement: d3ta03536k1.pdf [file d3ta03536k1.pdf]

Supporting Information for

## **A Fluffy All-Siloxane Bottlebrush Architecture for Liquid-like Slippery Surfaces**

Yunjiao Gu,<sup>ab</sup> He Zhou,<sup>ac</sup> Fenghua Liu,<sup>ab</sup> Shuxue Zhou,<sup>\*d</sup> Weiping Wu<sup>\*ab</sup>

<sup>a</sup> Laboratory of Thin Film Optics, Shanghai Institute of Optics and Fine Mechanics, Chinese Academy of Sciences, Shanghai, 201800, China

<sup>b</sup> State Key Laboratory of High Field Laser Physics, Chinese Academy of Sciences, Shanghai, 201800, China

<sup>c</sup> School of Microelectronics, Shanghai University, Shanghai 201800, China

<sup>d</sup> Department of Materials Science, State Key Laboratory of Molecular Engineering of Polymers, Advanced Coatings Research Center of Ministry of Education of China, Fudan University, Shanghai 200433, China

\* Corresponding authors,

Email: [wuwp@siom.ac.cn](mailto:wuwp@siom.ac.cn) (W. Wu), [zhoushuxue@fudan.edu.cn](mailto:zhoushuxue@fudan.edu.cn) (S. Zhou)

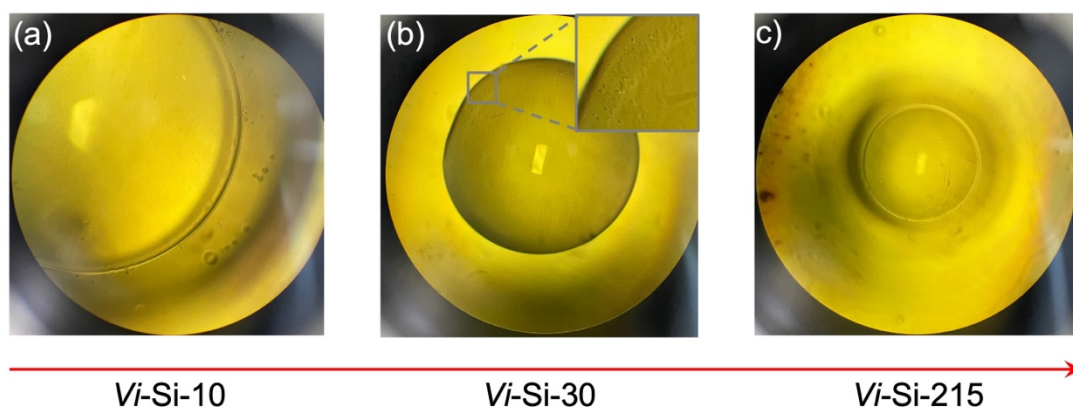

**Fig. S1** Optical microscope images of *in-situ* condensation transformation of a DMVS silane drop during the drying process: (a) 10 min, (b) 30 min, (c) 215 min, at the glass, substrates with a total magnification of 200x (20x objective lens, 10x eyepiece lens).

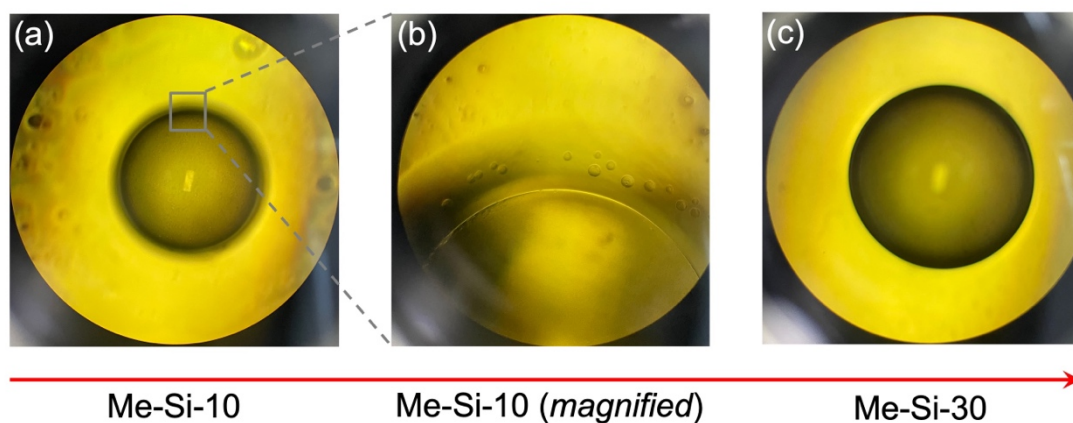

**Fig. S2** Optical microscope images of *in-situ* condensation transformation of a DMS silane drop during the drying process: (a) 10 min, (b) magnified from (a), (c) 30 min, at the glass substrates with a total magnification of 200x (20x objective lens, 10x eyepiece lens).

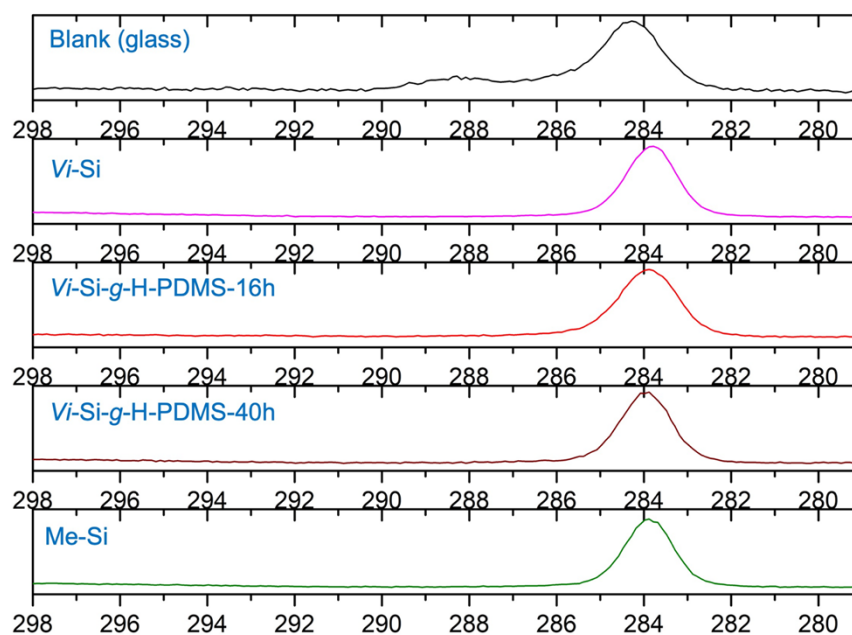

**Fig. S3** XPS C 1s spectra of the bottlebrush surfaces prepared before (denoted as *Vi-Si*) and after grafting the side chain molecules mono-hydride terminated polydimethylsiloxane for 16h or 40h as the second step (denoted as *Vi-Si-g-H-PDMS-16h* or *40h*), with blank glass and Me-Si string-grafted surfaces for comparison.

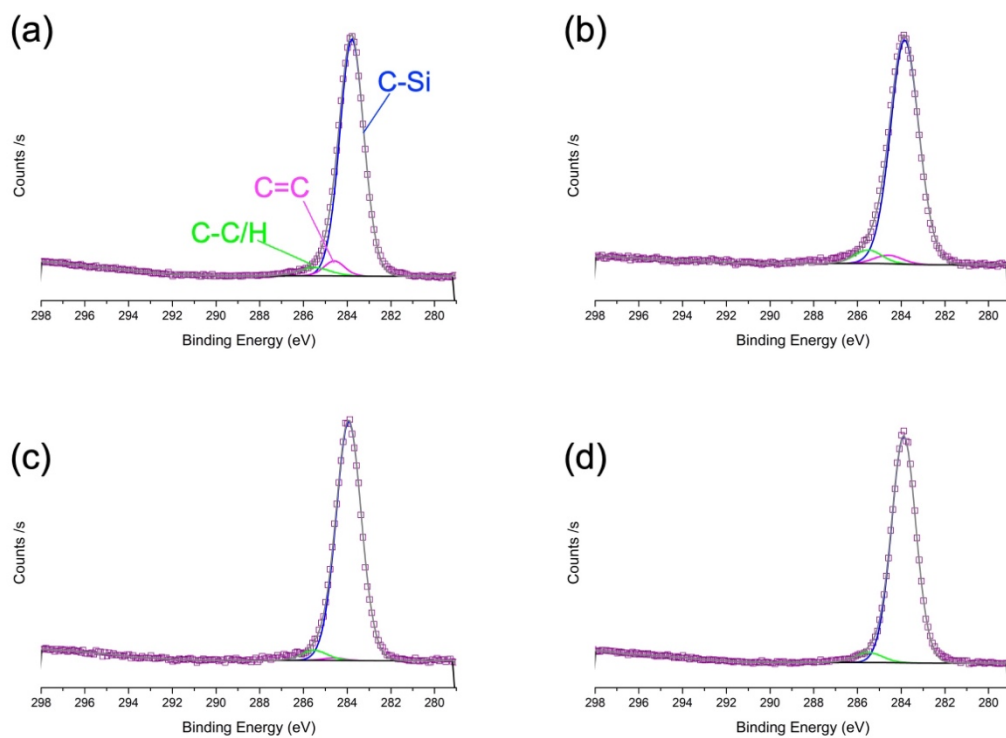

**Fig. S4** High-resolution XPS C 1s spectra of the bottlebrush surfaces prepared (a) before (denoted as *Vi*-Si) and after grafting the side chain molecules mono-hydride terminated polydimethylsiloxane for (b) 16h or (c) 40h as the second step (denoted as *Vi*-Si-g-H-PDMS-16h or 40h), with (d) Me-Si string-grafted surfaces for comparison.

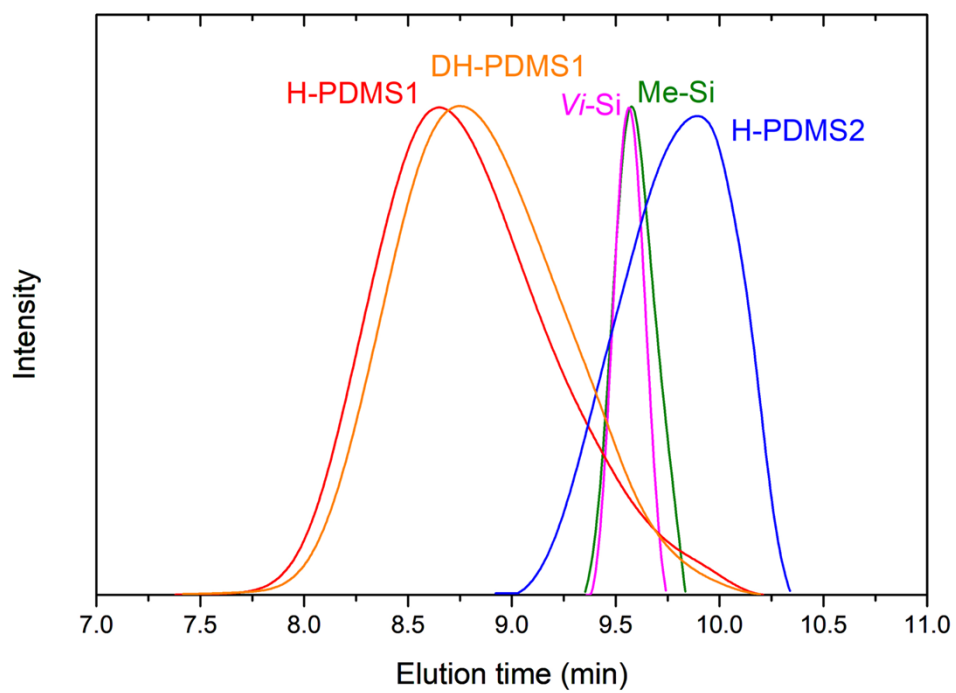

**Fig. S5** GPC elution profiles of *Vi*-Si, Me-Si, H-PDMS1, H-PDMS2 and DH-PDMS1.

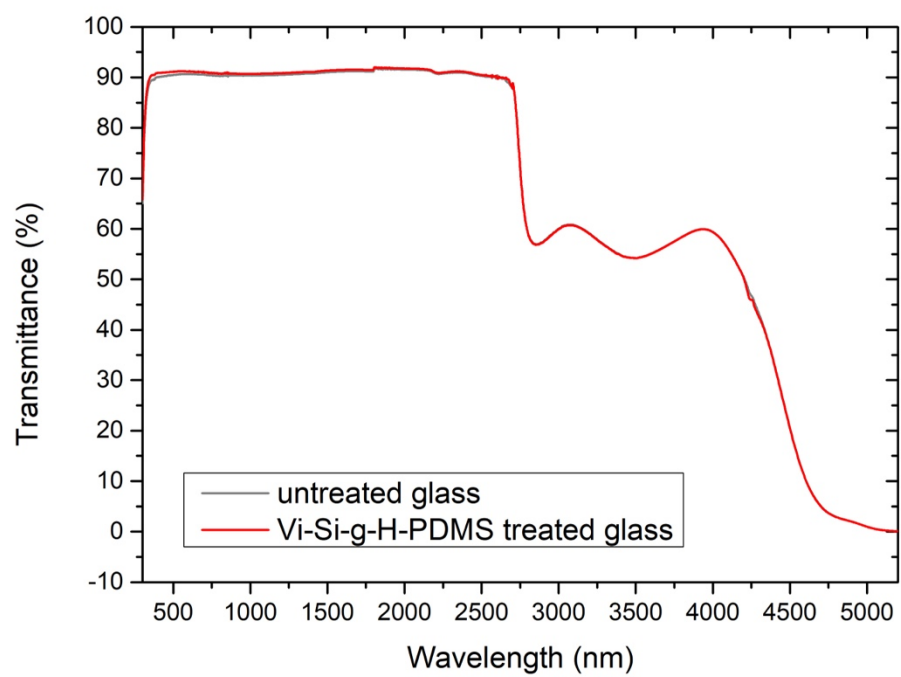

**Fig. S6** Optical transmittance of the untreated glass (grey) and *Vi*-Si-g-H-PDMS glass (red) in the visible and infrared range.

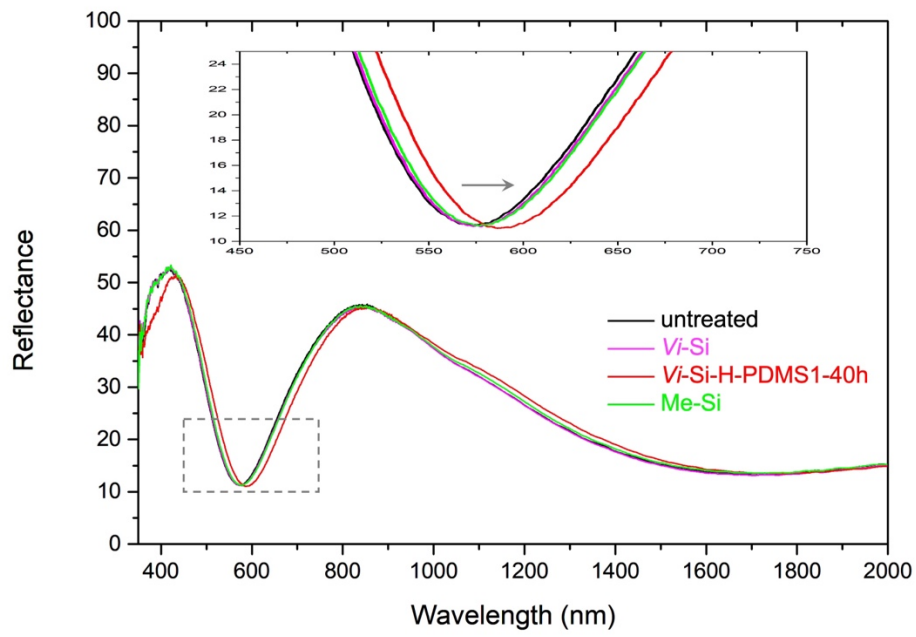

**Fig. S7** Reflectance spectra of *p*-type silicon wafer capped with a 300 nm silicon dioxide (SiO<sub>2</sub>) layer, after different surface treatment.

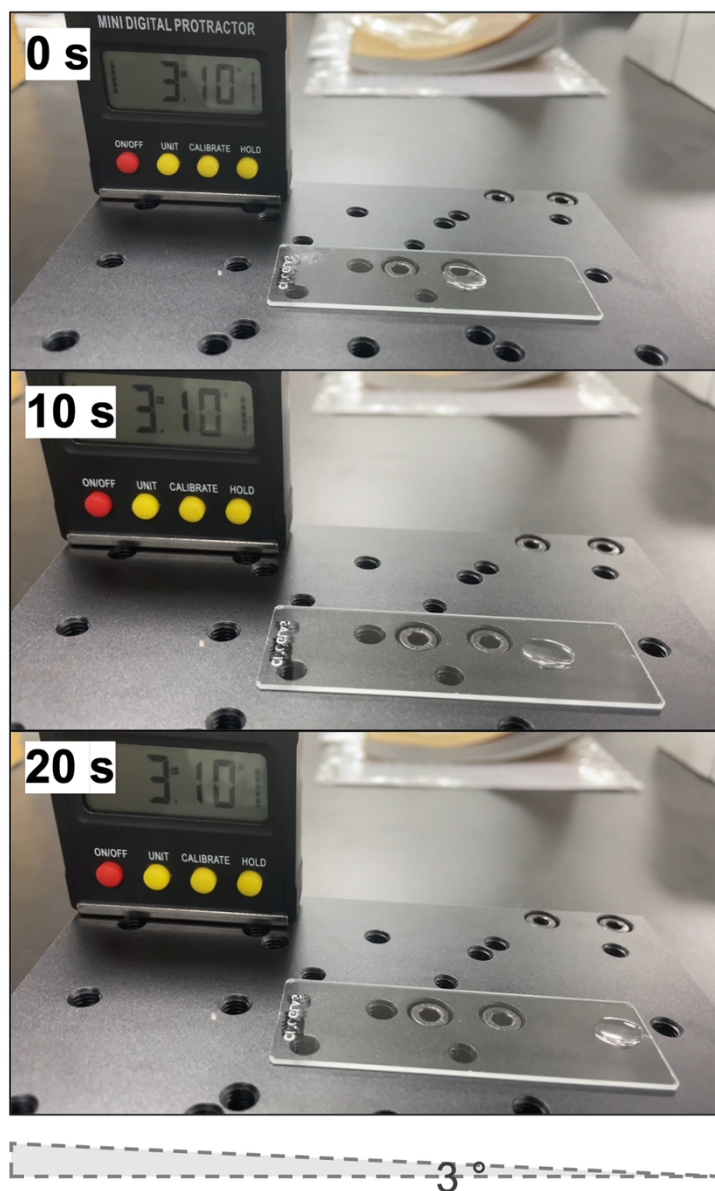

**Fig. S8** Time-sequence images of a  $\sim 20 \mu\text{L}$  droplet on a *Vi-Si-g-H-PDMS* surface with a titled stage of  $3^\circ$  (Probing liquid: cyclohexane).
